# Supplementary material for: A data infrastructure for the assessment of health care performance: lessons from the BRIDGE-health project
Source: Springer Nature journal article supplement (doi:10.1186/s13690-017-0245-1), 2018-01-24
Supplement: MOESM1 [file 15412616]

## ANNEX 1 -Minimum Common Dataset

| Variable name | Description             | Definition                                                   | SPAIN | PORTUGAL | SLOVENIA | DENMARK | ENGLAND | AUSTRIA | HUNGARY |
|---------------|-------------------------|--------------------------------------------------------------|-------|----------|----------|---------|---------|---------|---------|
| rec           | clinical record number  |                                                              |       |          |          |         |         |         |         |
| id            | patient id              |                                                              |       |          |          |         |         |         |         |
| zip           | address post code       | address post code                                            |       |          |          |         |         |         |         |
| hospital      | hospital id             | hospital of treatment                                        |       |          |          |         |         |         |         |
| country       | country identification  | country identification                                       |       |          |          |         |         |         |         |
| mare1         | meaningful area level 1 | area of residence - country                                  |       |          |          |         |         |         |         |
| mare2         | meaningful area level 2 | area of residence - region                                   |       |          |          |         |         |         |         |
| mare3         | meaningful area level 3 | area of residence - health care area                         |       |          |          |         |         |         |         |
| mare4         | meaningful area level 4 | area of residence - municipality                             |       |          |          |         |         |         |         |
| year          | year                    | year                                                         |       |          |          |         |         |         |         |
| age           | age                     | age                                                          |       |          |          |         |         |         |         |
| gqe           | age group               | age group                                                    |       |          |          |         |         |         |         |
| echokey       | echo key                |                                                              |       |          |          |         |         |         |         |
| bdate         | brith date              | patient's birth date                                         |       |          |          |         |         |         |         |
| sex           | sex                     | patient's gender                                             |       |          |          |         |         |         |         |
| adate         | admission date          | patient's date of admission                                  |       |          |          |         |         |         |         |
| tadm          | type of admission       | patient's admission to the hospital: programmed/urgent/other |       |          |          |         |         |         |         |
| disdate       | discharge date          | patient's date of discharge                                  |       |          |          |         |         |         |         |
| tdis          | type of discharge       | type of patient's discharge: alive/dead/tranfered/other      |       |          |          |         |         |         |         |
| intdate       | intervention date       | patient's date of surgery                                    |       |          |          |         |         |         |         |
| diag1         | principal diagnosis     | patient's principal diagnosis                                |       |          |          |         |         |         |         |
| diag2-30      | secondary diagnoses     | patient's secondary diagnoses                                |       |          |          |         |         |         |         |
| proc1         | main procedure          | main procedure                                               |       |          |          |         |         |         |         |
| proc2-30      | other procedures        | secondary procedures                                         |       |          |          |         |         |         |         |
| dcc           | day case care           | day-case surgery/diagnostic & therapeutic procedures         |       |          |          |         |         |         |         |
| mfund         | modality of funding     | if the stay/procedure was funded by public or private        |       |          |          |         |         |         |         |
| los           | length of stay          | length of stay                                               |       |          |          |         |         |         |         |
| readm         | readmission             | readmission                                                  |       |          |          |         |         |         |         |

Note: Dark green cells represent the information common to all countries. Yellow cells represent the information lacking in some countries.
